# Supplementary material for: Synthesis of amphiphilic diblock copolymers derived from renewable dextran by nitroxide mediated polymerization: towards hierarchically structured honeycomb porous films
Source: Royal Society of Chemistry journal article supplement (doi:10.1039/c4py00390j), 2014-01-01
Supplement: c4py00390j1.pdf [file c4py00390j1.pdf]

**Synthesis of amphiphilic diblock copolymers derived  
from renewable dextran by nitroxide mediated  
polymerization: towards hierarchically structured  
honeycomb porous films**

*Senbin Chen, Marie-Hélène Alves, Maud Save and Laurent Billon\**

Université Pau & Pays Adour, CNRS, UMR 5254 – IPREM – Equipe de Physique et Chimie des  
Polymères, 2 avenue du Président Angot, Pau, F-64053, France.

Corresponding author: [laurent.billon@univ-pau.fr](mailto:laurent.billon@univ-pau.fr)

### Calcul of the degree of functionalization from proton NMR integrations

The degree of functionalization ( $f$ ) was calculated by using the following equation:  $f$  (%) = [Integration from 0.91 to 1.62 ppm in **Figure 1D** / theoretical integration for 100 % functionalization from 0.91 to 1.62 ppm]  $\times$  100% = [24.79 / (30 + 8)]  $\times$  100% = 65 %, where 30 and 8 are the protons of SG1 (**Figure 1A**) and hexylenediamine (**Figure 1C**) from 0.91 to 1.62 ppm, respectively.

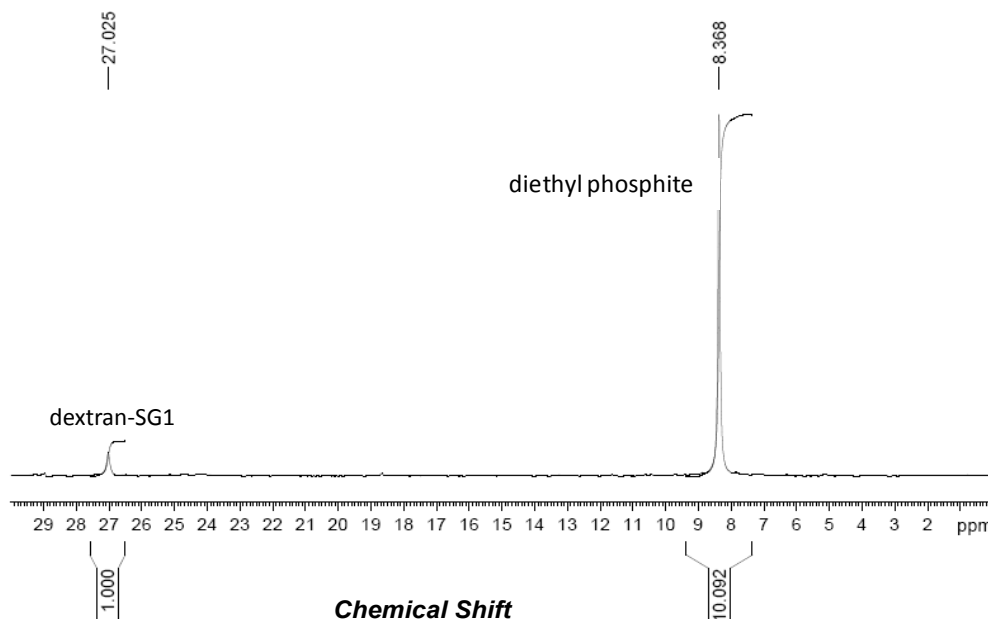

**Figure S1.**  $^{31}\text{P}$  NMR of mixture of dextran-SG1 (11 mg) and diethyl phosphite (5.5 mg) in  $\text{DMSO-}d_6$  at  $25^\circ\text{C}$ , the functionality ( $f$ ) was calculated by using the following equation:

$$\frac{n_{SG1}}{n_{diethylphosphite}} = \frac{m_{polymer} / (M_{n,dext-SG1} * f + M_{n,dext-NH2} * (1-f))}{m_{diethylphosphite} / M_{diethylphosphite}} = \frac{I_{NMR,SG1}}{I_{NMR,diethylphosphite}}$$

$$\frac{n_{SG1}}{n_{diethylphosphite}} = \frac{0.011 / (363f + 2698)}{0.0055 / 138} = \frac{I_{NMR,27\text{ ppm}}}{I_{NMR,8\text{ ppm}}} \Rightarrow f = 0.61$$

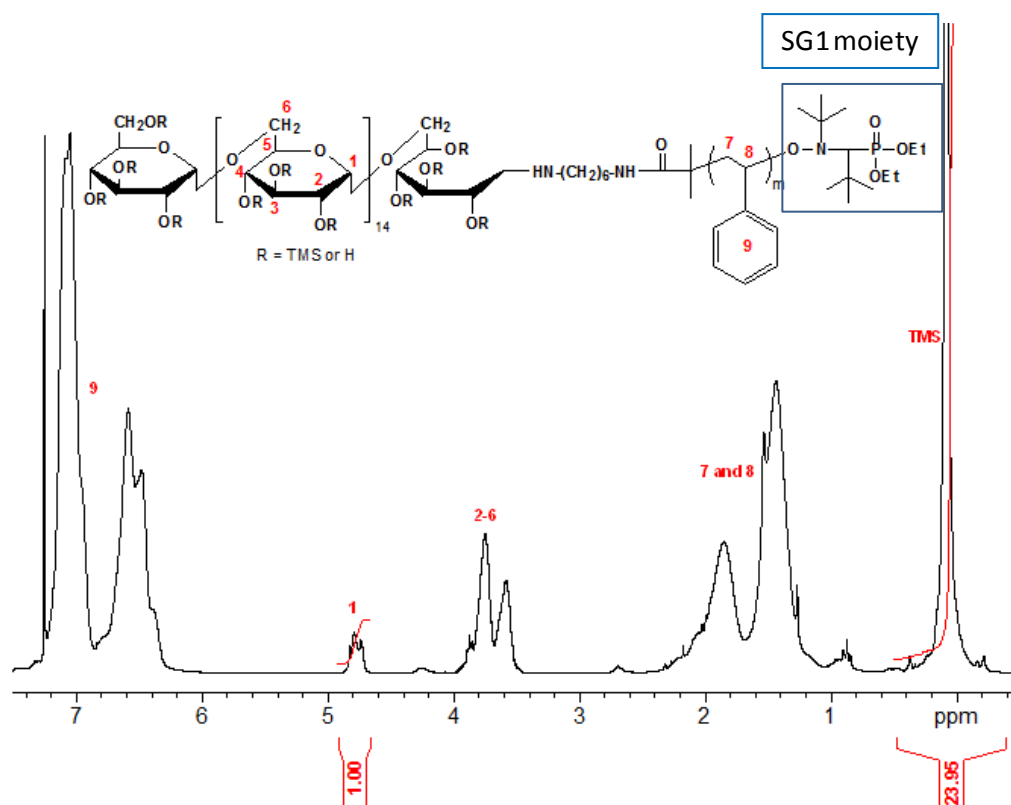

**Figure S2.** <sup>1</sup>H NMR of partial (88.7%) silylated dextran-*b*-PS in CDCl<sub>3</sub> at 25°C, the silylation degree (SD) was calculated by using the following equation: SD (%) = [Integration<sub>TMS</sub> / (27 × Integration<sub>1</sub>)] × 100%.

**Calculation of respective degree of polymerization of styrene ( $n$ ) and MMA ( $m$ ) units in dextran-*b*-P(MMA<sub>*m*</sub>-*co*-S<sub>*n*</sub>) copolymers from proton NMR integrations ( $I$ ) (see Figure 3 of article for assignment of NMR peaks):**

$$n = \frac{I_3}{5}$$

$$m = \frac{I_{1,2,4,5} - (I_3/5) \times 3 - [(I_g/15) \times 0.625 \times 38]}{5}$$

The value of 0.625 corresponds to the average value of dextran-SG1 chain end functionality and value of 38 corresponds to the 38 protons of SG1 chain end.

The fraction of styrene in the final copolymer was calculated as follows:

$$F_s = \frac{n}{n + m}$$

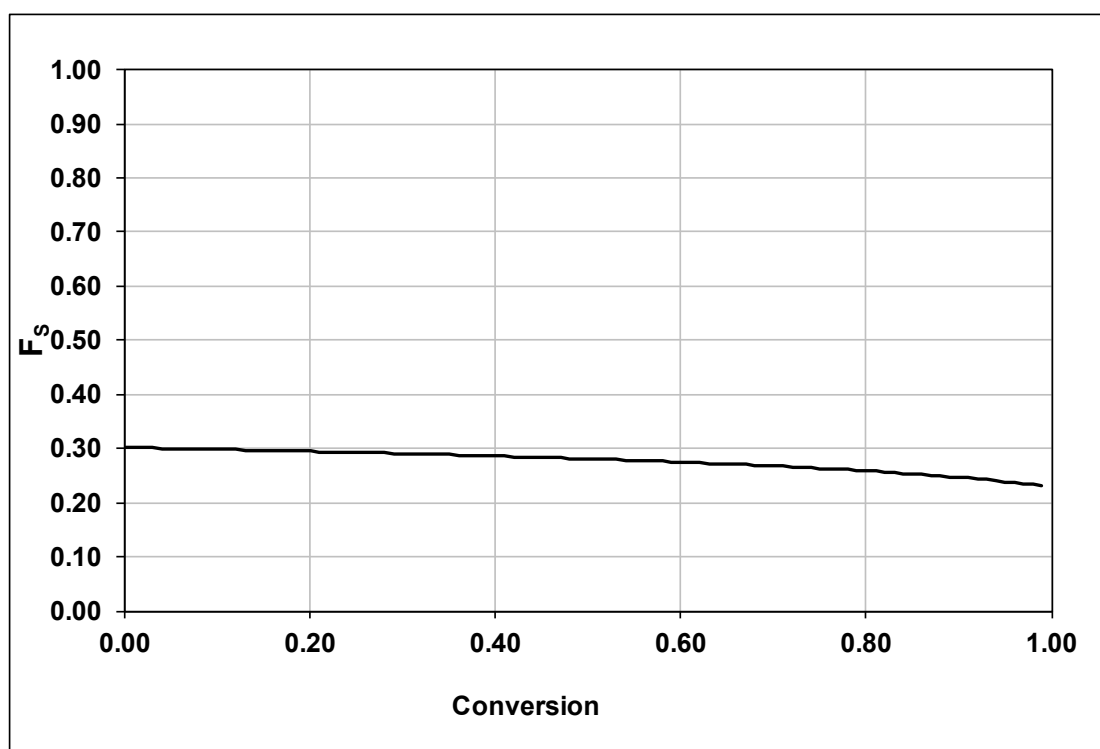

**Figure S3.** Theoretical average composition of styrene ( $F_S$ ) in a P(S-*co*-MMA) copolymer starting with  $f_S = 0.23$  and using values of reactivity ratio of:  $r_S = 0.489$ ,  $r_{MMA} = 0.493$
